# Supplementary material for: Mental and Physical Well-Being and Burden in Palliative Care Nursing: A Cross-Setting Mixed-Methods Study
Source: Int J Environ Res Public Health. 2022 May 20;19(10):6240. doi: 10.3390/ijerph19106240 (PMC9141775; doi:10.3390/ijerph19106240)
Supplement: Supplementary file 1 [file ijerph-19-06240-s001.zip › Supplementary Material S3_GRAMMS.pdf]

### Good Reporting of A Mixed Methods Study (GRAMMS) checklist

| Guideline                                                                                   | Section: page   |
|---------------------------------------------------------------------------------------------|-----------------|
| Describe the justification for using a mixed methods approach to the research question      | Study design: 2 |
| Describe the design in terms of the purpose, priority and sequence of methods               | Methods: 2-5    |
| Describe each method in terms of sampling, data collection and analysis                     | Methods: 2-5    |
| Describe where integration has occurred, how it has occurred and who has participated in it | Discussion: 17  |
| Describe any limitation of one method associated with the present of the other method       | Discussion: 19  |
| Describe any insights gained from mixing or integrating methods                             | Discussion: 17  |

O'Cathain A, Murphy E, Nicholl J. The quality of mixed methods studies in health services research. J Health Serv Res Policy. 2008;13: 92-98.
